# Supplementary material
Source: PubMed Central journal article supplement (PMC7994168)
Supplement: ajcr0011-0812-f6.pdf [file ajcr0011-0812-f6.pdf]

# CHPF promotes breast cancer malignancy

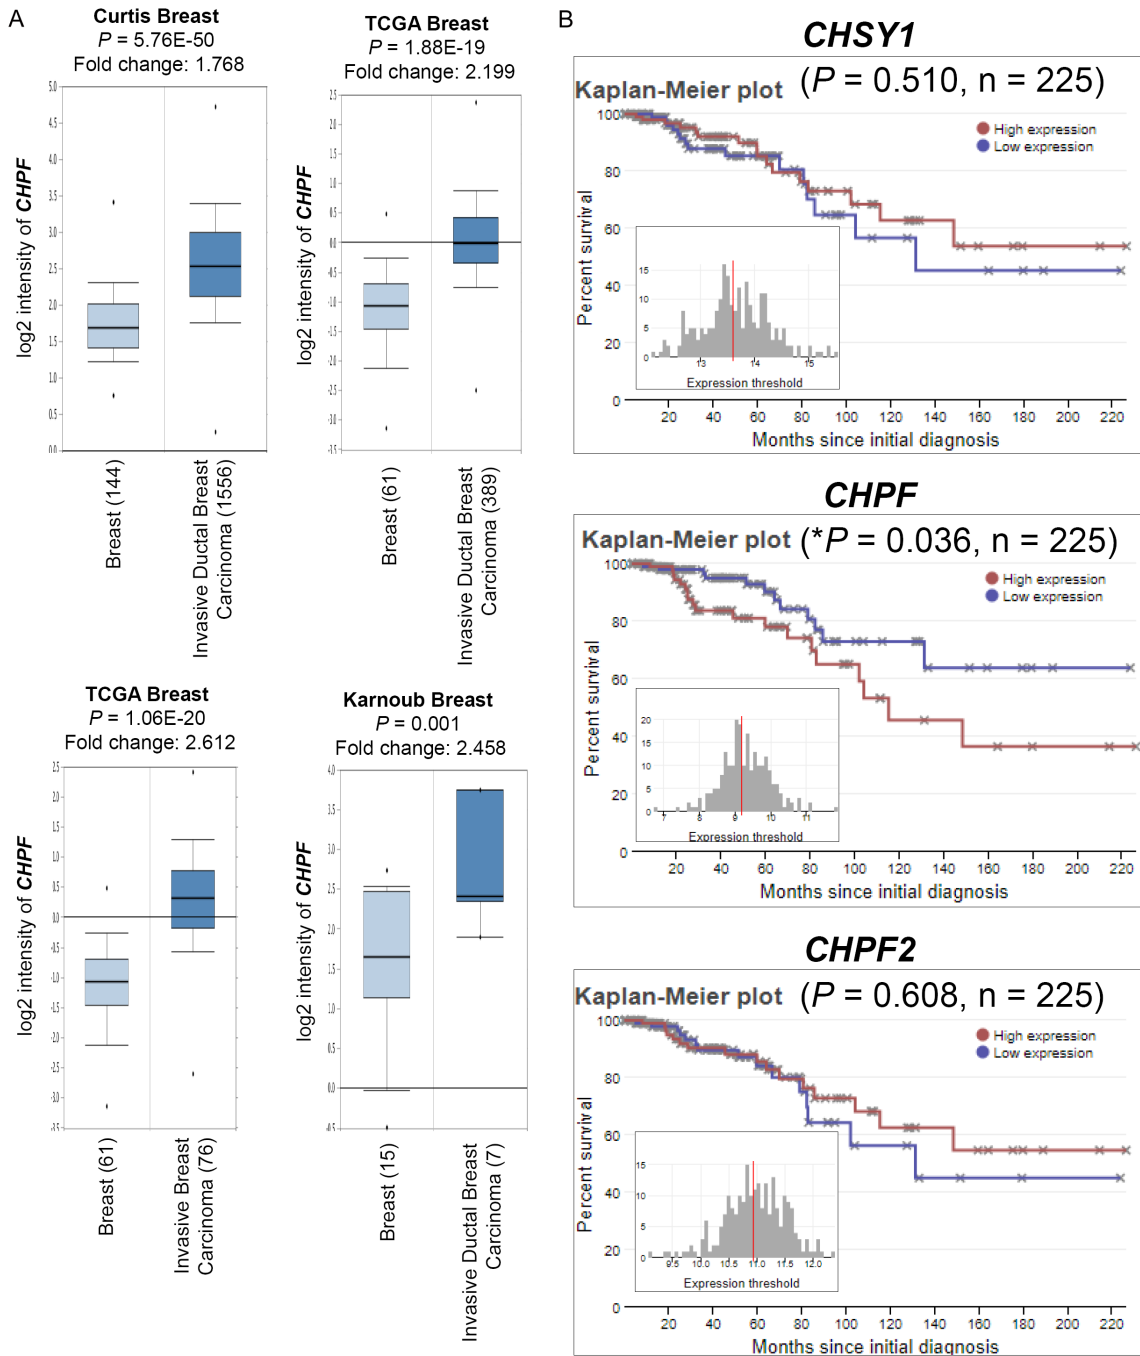

**Figure S1.** Expression of CS synthases in breast cancer patients. A. Expression of *CHPF* is significantly up-regulated in several breast cancer datasets from ONCOMINE database. B. Overall survival analysis of three major bifunctional chondroitin sulfate synthases (*CHSY1*, *CHPF*, and *CHPF2*) in breast cancer patients by Betastasis.com (<http://www.betastasis.com/>).

## CHPF promotes breast cancer malignancy

**Table S1.** Summary of multiple comparison of *CHPF* expression in breast cancer subtype

| Comparisons (number of cases)         | Mean Diff. | 95% CI of diff. | Significant | P Value  |
|---------------------------------------|------------|-----------------|-------------|----------|
| Normal (104) vs. Normal-like (35)     | -1.483     | -1.95 to -1.02  | Yes         | < 0.0001 |
| Normal (104) vs. LumA (483)           | -1.293     | -1.55 to -1.04  | Yes         | < 0.0001 |
| Normal (104) vs. LumB (190)           | -1.047     | -1.34 to -0.76  | Yes         | < 0.0001 |
| Normal (104) vs. Her2 (73)            | -1.636     | -2.00 to -1.27  | Yes         | < 0.0001 |
| Normal (104) vs. Basal-like (166)     | -1.381     | -1.68 to -1.08  | Yes         | < 0.0001 |
| Normal-like (35) vs. LumA (483)       | 0.1898     | -0.23 to 0.61   | No          | 0.9504   |
| Normal-like (35) vs. LumB (190)       | 0.4359     | -0.002 to 0.87  | No          | 0.0521   |
| Normal-like (35) vs. Her2 (73)        | -0.1532    | -0.64 to 0.34   | No          | 0.9987   |
| Normal-like (35) vs. Basal-like (166) | 0.1017     | -0.34 to 0.54   | No          | > 0.9999 |
| LumA (483) vs. LumB (190)             | 0.2460     | 0.042 to 0.45   | Yes         | 0.0062   |
| LumA (483) vs. Her2 (73)              | -0.3430    | -0.64 to -0.044 | Yes         | 0.0117   |
| LumA (483) vs. Basal-like (166)       | -0.08817   | -0.30 to 0.13   | No          | 0.9791   |
| LumB (190) vs. Her2 (73)              | -0.5890    | -0.92 to -0.26  | Yes         | < 0.0001 |
| LumB (190) vs. Basal-like (166)       | -0.3342    | -0.59 to -0.081 | Yes         | 0.0017   |
| Her2 (73) vs. Basal-like (166)        | 0.2549     | -0.079 to 0.59  | No          | 0.3209   |

**Table S2.** Summary of multiple comparison of *CHPF* expression within breast cancer stages

| Comparisons (number of cases)      | Mean Diff. | 95% CI of diff.    | Significant | P Value  |
|------------------------------------|------------|--------------------|-------------|----------|
| Normal (104) vs. Stage I (165)     | -1.293     | -1.582 to -1.004   | Yes         | < 0.0001 |
| Normal (104) vs. Stage II (555)    | -1.260     | -1.506 to -1.013   | Yes         | < 0.0001 |
| Normal (104) vs. Stage III (210)   | -1.355     | -1.632 to -1.079   | Yes         | < 0.0001 |
| Normal (104) vs. Stage IV (17)     | -1.592     | -2.196 to -0.9886  | Yes         | < 0.0001 |
| Stage I (165) vs. Stage II (555)   | 0.03357    | -0.1710 to 0.2381  | No          | > 0.9999 |
| Stage I (165) vs. Stage III (210)  | -0.06235   | -0.3023 to 0.1776  | No          | 0.9981   |
| Stage I (165) vs. Stage IV (17)    | -0.2990    | -0.8866 to 0.2887  | No          | 0.8117   |
| Stage II (555) vs. Stage III (210) | -0.09593   | -0.2828 to 0.09097 | No          | 0.8035   |
| Stage II (555) vs. Stage IV (17)   | -0.3325    | -0.9006 to 0.2355  | No          | 0.6543   |
| Stage III (210) vs. Stage IV (17)  | -0.2366    | -0.8183 to 0.3451  | No          | 0.9467   |

## CHPF promotes breast cancer malignancy

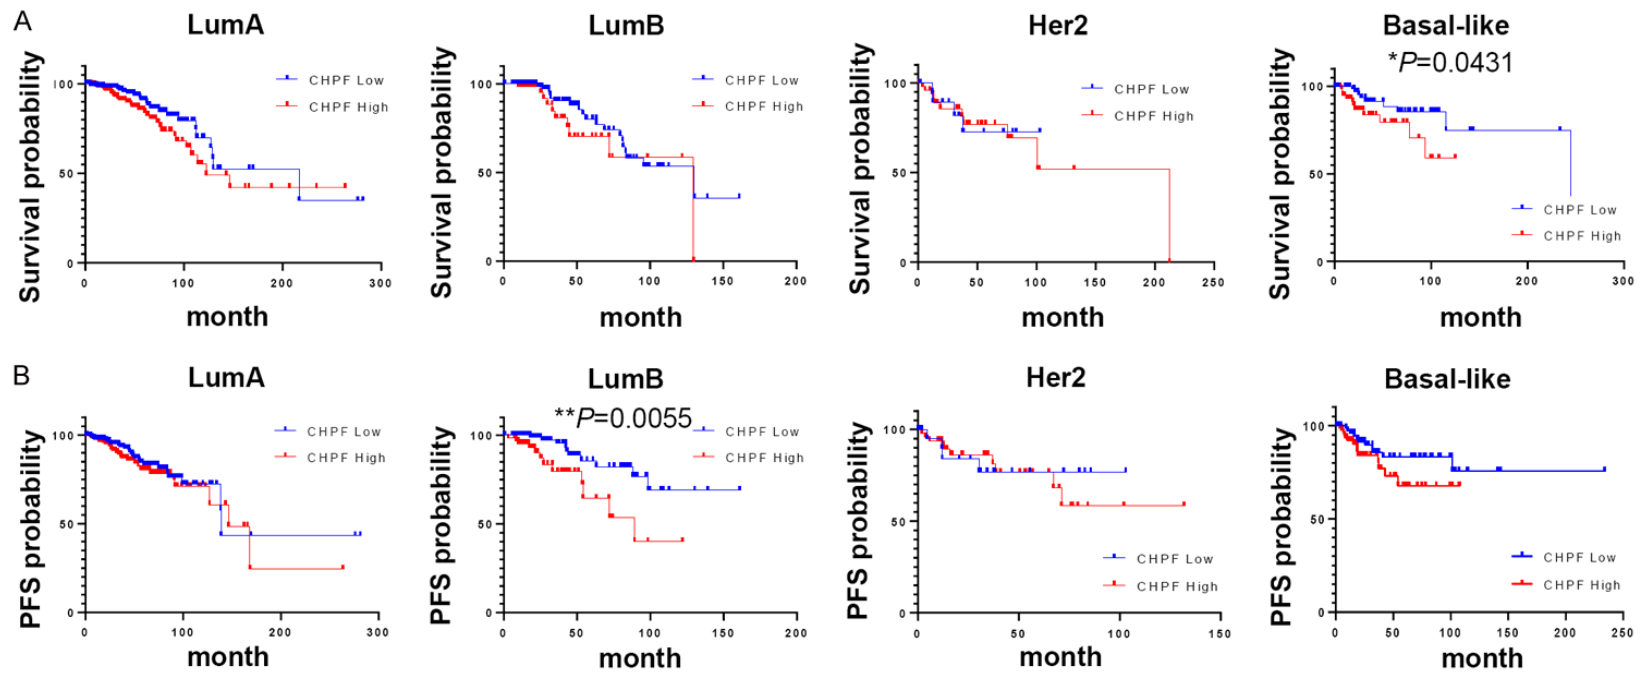

**Figure S2.** Overall survival and progression-free survival analysis according to expression of CHPF in different breast cancer subtypes. (A) Overall survival (B) progression-free survival (PFS). luminal A (LumA), luminal B (LumB), HER2-enriched (Her2), and Triple-negative (basal-like).

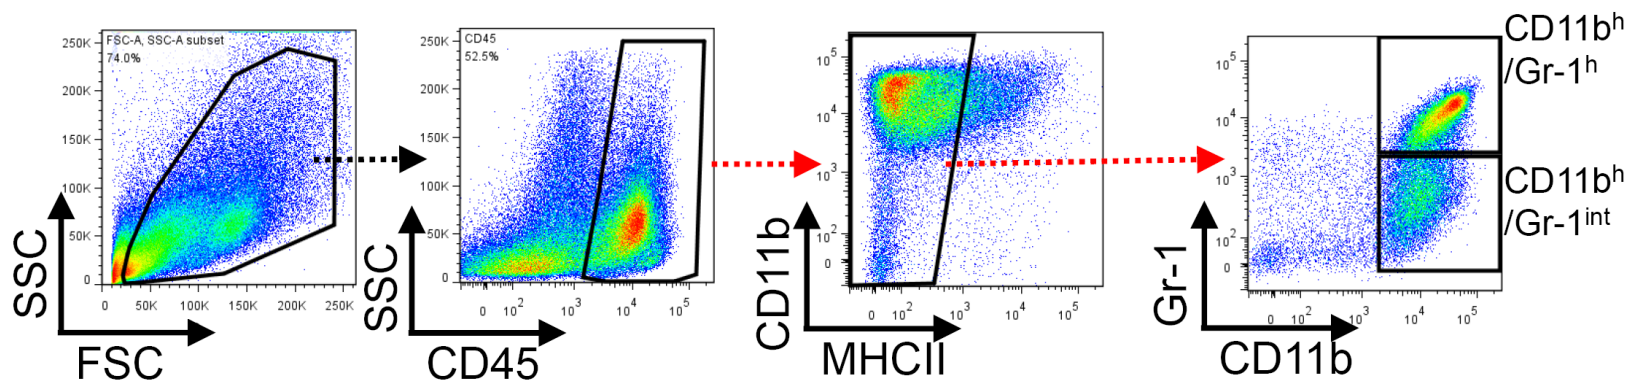

**Figure S3.** Representative gating strategy for myeloid-derived suppressor cell population in tumor tissue.
